# Supplementary material for: Captive Reptile Mortality Rates in the Home and Implications for the Wildlife Trade
Source: PubMed Central journal article supplement (PMC4640569; doi:10.1371/journal.pone.0141460), 2015-11-10
Supplement: pone.0141460.s001.pdf [file pone.0141460.s001.pdf]

This questionnaire is not self-complete and should be administered by a trained research assistant

|                  |  |                     |  |
|------------------|--|---------------------|--|
| <b>Date:</b>     |  | <b>Interviewer:</b> |  |
| <b>Location:</b> |  |                     |  |

## REPTILE QUESTIONNAIRE

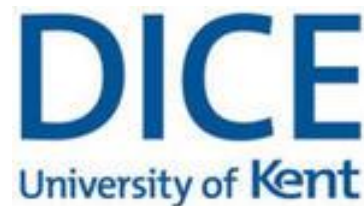

|                                                                        |                          |
|------------------------------------------------------------------------|--------------------------|
| <b>DO YOU GIVE YOUR CONSENT TO PARTICIPATE IN THIS STUDY? TICK BOX</b> | <input type="checkbox"/> |
|------------------------------------------------------------------------|--------------------------|

|          |                                                                                 |              |
|----------|---------------------------------------------------------------------------------|--------------|
| <b>1</b> | <b>Have you acquired a reptile in the last five years? <i>please circle</i></b> | <b>Y / N</b> |
|----------|---------------------------------------------------------------------------------|--------------|

*If yes, continue with questionnaire*

|          |                                                                                   |                               |
|----------|-----------------------------------------------------------------------------------|-------------------------------|
| <b>2</b> | <b>What type of reptile keeper do you consider yourself to be?</b>                | <b><i>Tick one option</i></b> |
| a        | Private reptile keeper (those keeping reptiles for pleasure)                      |                               |
| b        | Private reptile breeder (those keeping and breeding reptiles mainly for pleasure) |                               |
| c        | Private reptile breeder (those keeping reptiles mainly for monetary gain)         |                               |
| d        | Commercial enterprise (those buying/selling/breeding as part of a business)       |                               |

*If Q2 d was selected, ask question 3. Otherwise, continue to Q4*

|          |                                                                       |              |
|----------|-----------------------------------------------------------------------|--------------|
| <b>3</b> | <b>Do you sell dry goods as well as animals? <i>please circle</i></b> | <b>Y / N</b> |
|----------|-----------------------------------------------------------------------|--------------|

|          |                                                                                |  |
|----------|--------------------------------------------------------------------------------|--|
| <b>4</b> | <b>What do you understand the following terms to mean? <i>Please state</i></b> |  |
|          | Captive Bred                                                                   |  |
|          | Long Term Captive                                                              |  |
|          | Captive Farmed                                                                 |  |
|          | Ranched                                                                        |  |
|          | Wild Caught                                                                    |  |

The following questions relate to your experience keeping different reptile groups. Anything you know as 'Long Term Captive (LTC)' is included with the 'Wild' category for this questionnaire. I am going to ask you questions for each reptile group and then split it down, so it may seem like I am asking the same question twice in some cases.

| Have you acquired any _____ in the last five years?<br>This includes reptiles brought into collection, not births |     | 5. [RRT] OF THE _____ THAT YOU ACQUIRED OVER THE LAST FIVE YEARS, HOW MANY DIED WITHIN THE FIRST 12 MONTHS? | 6. What is the average amount of time you hold this group before rehoming/sale/exchange, or do you not move them on? | 7. How many years' experience do you have in keeping this reptile group? | Based on your experience and not preconceived ideas about the group |                                                                          | 10. How many _____ have you acquired in the last 5 years, excluding births? If you are unsure, please estimate. | 22. [Direct Q] To be asked at end. Of the _____ that you acquired over the last 5 years, how many died within the first 12 months? |
|-------------------------------------------------------------------------------------------------------------------|-----|-------------------------------------------------------------------------------------------------------------|----------------------------------------------------------------------------------------------------------------------|--------------------------------------------------------------------------|---------------------------------------------------------------------|--------------------------------------------------------------------------|-----------------------------------------------------------------------------------------------------------------|------------------------------------------------------------------------------------------------------------------------------------|
|                                                                                                                   |     |                                                                                                             |                                                                                                                      |                                                                          | 8. How easy or difficult is this group to keep? [scale card]        | 9. How do you rate the survival of this group in captivity? [scale card] |                                                                                                                 |                                                                                                                                    |
| <b>SNAKES</b>                                                                                                     | all |                                                                                                             |                                                                                                                      |                                                                          |                                                                     |                                                                          |                                                                                                                 |                                                                                                                                    |
| Snakes                                                                                                            | C   | GO TO Q8 →                                                                                                  | GO TO Q8 →                                                                                                           | GO TO Q8 →                                                               | GO TO Q8 →                                                          | GO TO Q8 →                                                               | GO TO Q8 →                                                                                                      | GO TO Q8 →                                                                                                                         |
|                                                                                                                   | W   |                                                                                                             |                                                                                                                      |                                                                          |                                                                     |                                                                          |                                                                                                                 |                                                                                                                                    |
|                                                                                                                   | CF  |                                                                                                             |                                                                                                                      |                                                                          |                                                                     |                                                                          |                                                                                                                 |                                                                                                                                    |
|                                                                                                                   | U   |                                                                                                             |                                                                                                                      |                                                                          |                                                                     |                                                                          |                                                                                                                 |                                                                                                                                    |
| <b>Boas &amp; pythons</b>                                                                                         | all |                                                                                                             |                                                                                                                      |                                                                          |                                                                     |                                                                          |                                                                                                                 |                                                                                                                                    |
| Boas & pythons                                                                                                    | C   | GO TO Q8 →                                                                                                  | GO TO Q8 →                                                                                                           | GO TO Q8 →                                                               | GO TO Q8 →                                                          | GO TO Q8 →                                                               | GO TO Q8 →                                                                                                      | GO TO Q8 →                                                                                                                         |
|                                                                                                                   | W   |                                                                                                             |                                                                                                                      |                                                                          |                                                                     |                                                                          |                                                                                                                 |                                                                                                                                    |
|                                                                                                                   | CF  |                                                                                                             |                                                                                                                      |                                                                          |                                                                     |                                                                          |                                                                                                                 |                                                                                                                                    |
|                                                                                                                   | U   |                                                                                                             |                                                                                                                      |                                                                          |                                                                     |                                                                          |                                                                                                                 |                                                                                                                                    |
| <b>King &amp; rat snakes</b>                                                                                      | all |                                                                                                             |                                                                                                                      |                                                                          |                                                                     |                                                                          |                                                                                                                 |                                                                                                                                    |
| King snakes (Lampropeltis) & rat snakes (Elaphe)                                                                  | C   | GO TO Q8 →                                                                                                  | GO TO Q8 →                                                                                                           | GO TO Q8 →                                                               | GO TO Q8 →                                                          | GO TO Q8 →                                                               | GO TO Q8 →                                                                                                      | GO TO Q8 →                                                                                                                         |
|                                                                                                                   | W   |                                                                                                             |                                                                                                                      |                                                                          |                                                                     |                                                                          |                                                                                                                 |                                                                                                                                    |
|                                                                                                                   | CF  |                                                                                                             |                                                                                                                      |                                                                          |                                                                     |                                                                          |                                                                                                                 |                                                                                                                                    |
|                                                                                                                   | U   |                                                                                                             |                                                                                                                      |                                                                          |                                                                     |                                                                          |                                                                                                                 |                                                                                                                                    |
| <b>Other snakes</b>                                                                                               | all |                                                                                                             |                                                                                                                      |                                                                          |                                                                     |                                                                          |                                                                                                                 |                                                                                                                                    |
| Other snakes                                                                                                      | C   | GO TO Q8 →                                                                                                  | GO TO Q8 →                                                                                                           | GO TO Q8 →                                                               | GO TO Q8 →                                                          | GO TO Q8 →                                                               | GO TO Q8 →                                                                                                      | GO TO Q8 →                                                                                                                         |
|                                                                                                                   | W   |                                                                                                             |                                                                                                                      |                                                                          |                                                                     |                                                                          |                                                                                                                 |                                                                                                                                    |
|                                                                                                                   | CF  |                                                                                                             |                                                                                                                      |                                                                          |                                                                     |                                                                          |                                                                                                                 |                                                                                                                                    |

|                                | Have you acquired any _____ in the last five years?<br>This includes reptiles brought into collection, not births | 5. [RRT] OF THE _____ THAT YOU ACQUIRED OVER THE LAST FIVE YEARS, HOW MANY DIED WITHIN THE FIRST 12 MONTHS? | 6. What is the average amount of time you hold this group before rehoming/sale/exchange, or do you not move them on? | 7. How many years' experience do you have in keeping this reptile group? | Based on your experience and not preconceived ideas about the group |                                                                          | 10. How many _____ have you acquired in the last 5 years, excluding births? If you are unsure, please estimate. | 22. [Direct Q] To be asked at end. Of the _____ that you acquired over the last 5 years, how many died within the first 12 months? |
|--------------------------------|-------------------------------------------------------------------------------------------------------------------|-------------------------------------------------------------------------------------------------------------|----------------------------------------------------------------------------------------------------------------------|--------------------------------------------------------------------------|---------------------------------------------------------------------|--------------------------------------------------------------------------|-----------------------------------------------------------------------------------------------------------------|------------------------------------------------------------------------------------------------------------------------------------|
|                                |                                                                                                                   |                                                                                                             |                                                                                                                      |                                                                          | 8. How easy or difficult is this group to keep? [scale card]        | 9. How do you rate the survival of this group in captivity? [scale card] |                                                                                                                 |                                                                                                                                    |
|                                | U                                                                                                                 |                                                                                                             |                                                                                                                      |                                                                          |                                                                     |                                                                          |                                                                                                                 |                                                                                                                                    |
|                                | <b>CHELONIANs (tortoises etc)</b>                                                                                 | all                                                                                                         |                                                                                                                      |                                                                          |                                                                     |                                                                          |                                                                                                                 |                                                                                                                                    |
|                                | Chelonians (tortoises, turtles & terrapins)                                                                       | C                                                                                                           | →                                                                                                                    |                                                                          |                                                                     |                                                                          |                                                                                                                 |                                                                                                                                    |
|                                |                                                                                                                   | W                                                                                                           |                                                                                                                      |                                                                          |                                                                     |                                                                          |                                                                                                                 |                                                                                                                                    |
|                                |                                                                                                                   | CF                                                                                                          |                                                                                                                      |                                                                          |                                                                     |                                                                          |                                                                                                                 |                                                                                                                                    |
|                                |                                                                                                                   | U                                                                                                           |                                                                                                                      |                                                                          |                                                                     |                                                                          |                                                                                                                 |                                                                                                                                    |
|                                | <b>Tortoises &amp; box turtles</b>                                                                                | all                                                                                                         |                                                                                                                      |                                                                          |                                                                     |                                                                          |                                                                                                                 |                                                                                                                                    |
|                                |                                                                                                                   | Tortoises (Testudo) & box turtles (terrapene)                                                               | C                                                                                                                    |                                                                          |                                                                     |                                                                          |                                                                                                                 |                                                                                                                                    |
|                                | W                                                                                                                 |                                                                                                             |                                                                                                                      |                                                                          |                                                                     |                                                                          |                                                                                                                 |                                                                                                                                    |
|                                | CF                                                                                                                |                                                                                                             |                                                                                                                      |                                                                          |                                                                     |                                                                          |                                                                                                                 |                                                                                                                                    |
|                                | U                                                                                                                 |                                                                                                             |                                                                                                                      |                                                                          |                                                                     |                                                                          |                                                                                                                 |                                                                                                                                    |
| <b>Terrapins &amp; turtles</b> | all                                                                                                               |                                                                                                             |                                                                                                                      |                                                                          |                                                                     |                                                                          |                                                                                                                 |                                                                                                                                    |
|                                | Terrapins & turtles                                                                                               | C                                                                                                           |                                                                                                                      |                                                                          |                                                                     |                                                                          |                                                                                                                 |                                                                                                                                    |
|                                |                                                                                                                   | W                                                                                                           |                                                                                                                      |                                                                          |                                                                     |                                                                          |                                                                                                                 |                                                                                                                                    |
|                                |                                                                                                                   | CF                                                                                                          |                                                                                                                      |                                                                          |                                                                     |                                                                          |                                                                                                                 |                                                                                                                                    |
|                                |                                                                                                                   | U                                                                                                           |                                                                                                                      |                                                                          |                                                                     |                                                                          |                                                                                                                 |                                                                                                                                    |

| Have you acquired any _____ in the last five years?<br>This includes reptiles brought into collection, not births |     | 5. [RRT] OF THE _____ THAT YOU ACQUIRED OVER THE LAST FIVE YEARS, HOW MANY DIED WITHIN THE FIRST 12 MONTHS? | 6. What is the average amount of time you hold this group before rehoming/sale/exchange, or do you not move them on? | 7. How many years' experience do you have in keeping this reptile group? | Based on your experience and not preconceived ideas about the group. |                                                                          | 10. How many _____ have you acquired in the last 5 years, excluding births? If you are unsure, please estimate. | 22. [Direct Q] To be asked at end. Of the animals that you acquired over the last 5 years, how many died within the first 12 months? |
|-------------------------------------------------------------------------------------------------------------------|-----|-------------------------------------------------------------------------------------------------------------|----------------------------------------------------------------------------------------------------------------------|--------------------------------------------------------------------------|----------------------------------------------------------------------|--------------------------------------------------------------------------|-----------------------------------------------------------------------------------------------------------------|--------------------------------------------------------------------------------------------------------------------------------------|
|                                                                                                                   |     |                                                                                                             |                                                                                                                      |                                                                          | 8. How easy or difficult is this group to keep? [scale card]         | 9. How do you rate the survival of this group in captivity? [scale card] |                                                                                                                 |                                                                                                                                      |
| LIZARDS                                                                                                           | all |                                                                                                             |                                                                                                                      |                                                                          |                                                                      |                                                                          |                                                                                                                 |                                                                                                                                      |
| Lizards                                                                                                           | C   |                                                                                                             | →                                                                                                                    |                                                                          |                                                                      |                                                                          |                                                                                                                 |                                                                                                                                      |
|                                                                                                                   | W   |                                                                                                             |                                                                                                                      |                                                                          |                                                                      |                                                                          |                                                                                                                 |                                                                                                                                      |
|                                                                                                                   | CF  |                                                                                                             |                                                                                                                      |                                                                          |                                                                      |                                                                          |                                                                                                                 |                                                                                                                                      |
|                                                                                                                   | U   |                                                                                                             |                                                                                                                      |                                                                          |                                                                      |                                                                          |                                                                                                                 |                                                                                                                                      |
| Chameleons                                                                                                        | all |                                                                                                             |                                                                                                                      |                                                                          |                                                                      |                                                                          |                                                                                                                 |                                                                                                                                      |
|                                                                                                                   | C   |                                                                                                             |                                                                                                                      |                                                                          |                                                                      |                                                                          |                                                                                                                 |                                                                                                                                      |
|                                                                                                                   | W   |                                                                                                             |                                                                                                                      |                                                                          |                                                                      |                                                                          |                                                                                                                 |                                                                                                                                      |
|                                                                                                                   | CF  |                                                                                                             |                                                                                                                      |                                                                          |                                                                      |                                                                          |                                                                                                                 |                                                                                                                                      |
| U                                                                                                                 |     |                                                                                                             |                                                                                                                      |                                                                          |                                                                      |                                                                          |                                                                                                                 |                                                                                                                                      |
| Geckos                                                                                                            | all |                                                                                                             |                                                                                                                      |                                                                          |                                                                      |                                                                          |                                                                                                                 |                                                                                                                                      |
| Geckos                                                                                                            | C   |                                                                                                             |                                                                                                                      |                                                                          |                                                                      |                                                                          |                                                                                                                 |                                                                                                                                      |
|                                                                                                                   | W   |                                                                                                             |                                                                                                                      |                                                                          |                                                                      |                                                                          |                                                                                                                 |                                                                                                                                      |
|                                                                                                                   | CF  |                                                                                                             |                                                                                                                      |                                                                          |                                                                      |                                                                          |                                                                                                                 |                                                                                                                                      |
|                                                                                                                   | U   |                                                                                                             |                                                                                                                      |                                                                          |                                                                      |                                                                          |                                                                                                                 |                                                                                                                                      |
| Skinks                                                                                                            | all |                                                                                                             |                                                                                                                      |                                                                          |                                                                      |                                                                          |                                                                                                                 |                                                                                                                                      |
| Skinks                                                                                                            | C   |                                                                                                             |                                                                                                                      |                                                                          |                                                                      |                                                                          |                                                                                                                 |                                                                                                                                      |
|                                                                                                                   | W   |                                                                                                             |                                                                                                                      |                                                                          |                                                                      |                                                                          |                                                                                                                 |                                                                                                                                      |
|                                                                                                                   | CF  |                                                                                                             |                                                                                                                      |                                                                          |                                                                      |                                                                          |                                                                                                                 |                                                                                                                                      |
|                                                                                                                   | U   |                                                                                                             |                                                                                                                      |                                                                          |                                                                      |                                                                          |                                                                                                                 |                                                                                                                                      |

|                                                                                                                                  |                                                                                                                           |                                                                                                                             |                                                                                 |                                                                                    |                                                                                            |                                                                                                                        |                                                                                                                                                        |
|----------------------------------------------------------------------------------------------------------------------------------|---------------------------------------------------------------------------------------------------------------------------|-----------------------------------------------------------------------------------------------------------------------------|---------------------------------------------------------------------------------|------------------------------------------------------------------------------------|--------------------------------------------------------------------------------------------|------------------------------------------------------------------------------------------------------------------------|--------------------------------------------------------------------------------------------------------------------------------------------------------|
| <p><b>Have you acquired any _____ in the last five years?</b><br/>This includes reptiles brought into collection, not births</p> | <p><b>5. [RRT] OF THE _____ THAT YOU ACQUIRED OVER THE LAST FIVE YEARS, HOW MANY DIED WITHIN THE FIRST 12 MONTHS?</b></p> | <p>6. What is the average amount of time you hold this group before rehoming/sale/exchange, or do you not move them on?</p> | <p>7. How many years' experience do you have in keeping this reptile group?</p> | <p><b>Based on your experience and not preconceived ideas about the group.</b></p> |                                                                                            | <p>10. How many _____ have you acquired in the last 5 years, excluding births? If you are unsure, please estimate.</p> | <p><b>22. [Direct Q] To be asked at end.</b><br/>Of the animals that you acquired over the last 5 years, how many died within the first 12 months?</p> |
|                                                                                                                                  |                                                                                                                           |                                                                                                                             |                                                                                 | <p>8. How easy or difficult is this group to keep?<br/><i>[scale card]</i></p>     | <p>9. How do you rate the survival of this group in captivity?<br/><i>[scale card]</i></p> |                                                                                                                        |                                                                                                                                                        |

|                                                 |     |  |  |  |  |  |  |  |
|-------------------------------------------------|-----|--|--|--|--|--|--|--|
| <b>Iguanas</b>                                  | all |  |  |  |  |  |  |  |
| Iguanas                                         | C   |  |  |  |  |  |  |  |
|                                                 | W   |  |  |  |  |  |  |  |
|                                                 | CF  |  |  |  |  |  |  |  |
|                                                 | U   |  |  |  |  |  |  |  |
| <b>Tegus &amp; monitors</b>                     | all |  |  |  |  |  |  |  |
| Tegus & monitors (varanus)                      | C   |  |  |  |  |  |  |  |
|                                                 | W   |  |  |  |  |  |  |  |
|                                                 | CF  |  |  |  |  |  |  |  |
|                                                 | U   |  |  |  |  |  |  |  |
| <b>Agamids (dragons etc)</b>                    | all |  |  |  |  |  |  |  |
| Agamids (incl. water dragons & bearded dragons) | C   |  |  |  |  |  |  |  |
|                                                 | W   |  |  |  |  |  |  |  |
|                                                 | CF  |  |  |  |  |  |  |  |
|                                                 | U   |  |  |  |  |  |  |  |
| <b>Other lizards</b>                            | all |  |  |  |  |  |  |  |
| Other lizards                                   | C   |  |  |  |  |  |  |  |
|                                                 | W   |  |  |  |  |  |  |  |
|                                                 | CF  |  |  |  |  |  |  |  |

|  |                                                                                                                                         |                                                                                                                           |                                                                                                                             |                                                                                 |                                                                                    |                                                                                            |                                                                                                                               |                                                                                                                                                        |
|--|-----------------------------------------------------------------------------------------------------------------------------------------|---------------------------------------------------------------------------------------------------------------------------|-----------------------------------------------------------------------------------------------------------------------------|---------------------------------------------------------------------------------|------------------------------------------------------------------------------------|--------------------------------------------------------------------------------------------|-------------------------------------------------------------------------------------------------------------------------------|--------------------------------------------------------------------------------------------------------------------------------------------------------|
|  | <p><b>Have you acquired any _____ in the last five years?</b><br/>This includes reptiles brought <b>into</b> collection, not births</p> | <p><b>5. [RRT] OF THE _____ THAT YOU ACQUIRED OVER THE LAST FIVE YEARS, HOW MANY DIED WITHIN THE FIRST 12 MONTHS?</b></p> | <p>6. What is the average amount of time you hold this group before rehoming/sale/exchange, or do you not move them on?</p> | <p>7. How many years' experience do you have in keeping this reptile group?</p> | <p><b>Based on your experience and not preconceived ideas about the group.</b></p> |                                                                                            | <p>10. How many _____ have you acquired in the last <b>5</b> years, excluding births? If you are unsure, please estimate.</p> | <p><b>22. [Direct Q] To be asked at end.</b><br/>Of the animals that you acquired over the last 5 years, how many died within the first 12 months?</p> |
|  |                                                                                                                                         |                                                                                                                           |                                                                                                                             |                                                                                 | <p>8. How easy or difficult is this group to keep?<br/><i>[scale card]</i></p>     | <p>9. How do you rate the survival of this group in captivity?<br/><i>[scale card]</i></p> |                                                                                                                               |                                                                                                                                                        |
|  | U                                                                                                                                       |                                                                                                                           |                                                                                                                             |                                                                                 |                                                                                    |                                                                                            |                                                                                                                               |                                                                                                                                                        |

|    |                                                                            |           |            |             |           |
|----|----------------------------------------------------------------------------|-----------|------------|-------------|-----------|
| 11 | <b>How many years have you been keeping reptiles? <i>please circle</i></b> |           |            |             |           |
|    | 0-1 years                                                                  | 2-5 years | 6-10 years | 11-20 years | 21+ years |

General questions

|    |                                                                             |                                   |
|----|-----------------------------------------------------------------------------|-----------------------------------|
| 12 | <b>Are you a member of any of the following groups or societies?</b>        | <b><i>Tick all that apply</i></b> |
|    | British Herpetological Society (BHS)                                        |                                   |
|    | International Herpetological Society (IHS)                                  |                                   |
|    | Local or regional society i.e. Thames & Chiltern Herpetological Group etc.  |                                   |
|    | Taxa specific society e.g. British Chelonia Group                           |                                   |
|    | Other herpetological or conservation society (including ARG UK)             |                                   |
|    | I am not a member of any herpetological or conservation groups or societies |                                   |

|    |                                                                                                                                                                                     |              |
|----|-------------------------------------------------------------------------------------------------------------------------------------------------------------------------------------|--------------|
| 13 | <b>Do you have any specific training or qualifications relating to reptile biology or care (informal or formal) e.g. college course, worked in zoo or lab? <i>please circle</i></b> | <b>Y / N</b> |
|    | <b><i>Please specify</i></b>                                                                                                                                                        |              |

|    |                                    |              |
|----|------------------------------------|--------------|
| 14 | <b>Gender <i>please circle</i></b> | <b>M / F</b> |
|----|------------------------------------|--------------|

|    |                                                 |  |
|----|-------------------------------------------------|--|
| 15 | <b>Country of residence <i>please state</i></b> |  |
|----|-------------------------------------------------|--|

|    |                                                    |  |
|----|----------------------------------------------------|--|
| 16 | <b>First part of post code <i>please state</i></b> |  |
|----|----------------------------------------------------|--|

|    |                                                        |  |
|----|--------------------------------------------------------|--|
| 17 | <b>What is your year of birth? <i>please state</i></b> |  |
|----|--------------------------------------------------------|--|

|    |                                                          |                                 |                                |
|----|----------------------------------------------------------|---------------------------------|--------------------------------|
| 18 | <b>What is your marital status? <i>Please circle</i></b> |                                 |                                |
|    | Single, never married                                    | Married or domestic partnership | Widowed, divorced or separated |

|    |                                                                          |                               |
|----|--------------------------------------------------------------------------|-------------------------------|
| 19 | <b>What is the highest level of education you have <u>completed</u>?</b> | <b><i>Tick one option</i></b> |
|    | GCSE/O-Level/CSE                                                         |                               |
|    | Vocational qualifications (NVQ1+2)                                       |                               |
|    | A-Level or equivalent (NVQ3)                                             |                               |
|    | Bachelor or degree or equivalent (NVQ4)                                  |                               |
|    | Masters/PhD or equivalent                                                |                               |
|    | Other ( <i>please specify</i> )                                          |                               |

|  |                          |  |
|--|--------------------------|--|
|  | No formal qualifications |  |
|--|--------------------------|--|

|    |                                                                                       |                        |
|----|---------------------------------------------------------------------------------------|------------------------|
| 20 | <b>Employment/activity</b>                                                            | <b>Tick one option</b> |
|    | Working full time (more than 30 hours a week)                                         |                        |
|    | Working part-time (0-30 hours a week)                                                 |                        |
|    | Self-employed                                                                         |                        |
|    | Student ( <i>skip Q21</i> )                                                           |                        |
|    | Retired ( <i>skip Q21</i> )                                                           |                        |
|    | Temporarily unemployed and seeking work ( <i>skip Q21</i> )                           |                        |
|    | Permanently unemployed (e.g. chronically sick, independent means) ( <i>skip Q21</i> ) |                        |
|    | Not in paid work for other reason (e.g. house wife, carer) ( <i>skip Q21</i> )        |                        |

|    |                                                                                             |                  |                  |                  |              |
|----|---------------------------------------------------------------------------------------------|------------------|------------------|------------------|--------------|
| 21 | <b>What personal annual income band do you fall into (before tax)?</b> <i>please circle</i> |                  |                  |                  |              |
|    | Under £20,000                                                                               | £20,001 - 30,000 | £30,001 - 50,000 | £50,001 - 70,000 | Over £70,000 |

## Q 22 – DIRECT QUESTION

Evaluation questions

|    |                                                                                            |      |                            |           |                |
|----|--------------------------------------------------------------------------------------------|------|----------------------------|-----------|----------------|
| 23 | <b>How easy or difficult did you find the card method to use?</b> ( <i>please circle</i> ) |      |                            |           |                |
|    | Very easy                                                                                  | Easy | Neither easy nor difficult | Difficult | Very difficult |

|    |                                                                                                                             |                    |                                   |                    |                      |
|----|-----------------------------------------------------------------------------------------------------------------------------|--------------------|-----------------------------------|--------------------|----------------------|
| 24 | <b>When using the card method, how protected or unprotected did do you feel your answers were?</b> ( <i>please circle</i> ) |                    |                                   |                    |                      |
|    | Very protected                                                                                                              | Somewhat protected | Neither protected nor unprotected | Not very protected | Not at all protected |

|    |                                                                                                                                                                      |                    |                                   |                    |                      |
|----|----------------------------------------------------------------------------------------------------------------------------------------------------------------------|--------------------|-----------------------------------|--------------------|----------------------|
| 25 | <b>How sensitive do you consider the questions about the quantity of your reptiles that have died in the first year of you owning them?</b> ( <i>please circle</i> ) |                    |                                   |                    |                      |
|    | Very sensitive                                                                                                                                                       | Somewhat sensitive | Neither sensitive nor insensitive | Not very sensitive | Not at all sensitive |

|    |                                                                                                                                                                                            |        |                             |          |             |
|----|--------------------------------------------------------------------------------------------------------------------------------------------------------------------------------------------|--------|-----------------------------|----------|-------------|
| 26 | <b>When asked directly, how likely do you think people would be to tell the truth when asked about the quantity of reptiles that have died in the first year?</b> ( <i>please circle</i> ) |        |                             |          |             |
|    | Very likely                                                                                                                                                                                | Likely | Neither likely nor unlikely | Unlikely | Very likely |

Thank you for taking the time to complete this questionnaire.
