# Supplementary material for: Captive Reptile Mortality Rates in the Home and Implications for the Wildlife Trade
Source: PubMed Central journal article supplement (PMC4640569; doi:10.1371/journal.pone.0141460), 2015-11-10
Supplement: pone.0141460.s002.pdf [file pone.0141460.s002.pdf]

There is no way I can trace your answers back to you. You remain completely anonymous.

### Example

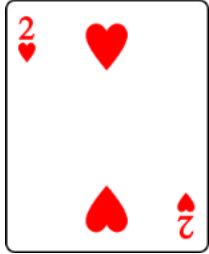

### INSTRUCTIONS

**Please pick a card from the pack – do not let me see what card you have**

Remember the rules:

**Queen** = answer the question truthfully

**Number card** = add the number on the card you have picked to your true response and report the total (Ace = 1)

**QUESTION:** Of the \_\_\_\_\_ that you acquired over the last five years, how many died within the first 12 months?

There is no way I can trace your answers back to you. You remain completely anonymous.

### Example

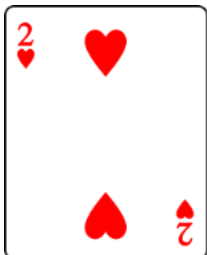

### INSTRUCTIONS

**Please pick a card from the pack – do not let me see what card you have**

Remember the rules:

**Queen** = answer the question truthfully

**Number card** = add the number on the card you have picked to your true response and report the total (Ace = 1)

**QUESTION:** Of the \_\_\_\_\_ that you acquired over the last five years, how many died within the first 12 months?
