# Supplementary material for: Captive Reptile Mortality Rates in the Home and Implications for the Wildlife Trade
Source: PubMed Central journal article supplement (PMC4640569; doi:10.1371/journal.pone.0141460), 2015-11-10
Supplement: pone.0141460.s004.pdf [file pone.0141460.s004.pdf]

**S1 Table. Respondents' evaluation of Additive RRT.** Evaluation of additive RRT, including percentage responses for each category. Questions were asked according to a five point Likert scale, with categories condensed for data presentation.

| Questions                                                                                                                                                  | Responses                           |                                   |                                           |
|------------------------------------------------------------------------------------------------------------------------------------------------------------|-------------------------------------|-----------------------------------|-------------------------------------------|
| How easy or difficult did you find the card method to use?                                                                                                 | Very easy / easy                    | Neither easy nor difficult        | Difficult / very difficult                |
|                                                                                                                                                            | <b>73.6% (n = 190)</b>              | <b>17.4% (n = 45)</b>             | <b>8.9% (n = 23)</b>                      |
| When using the card method, how protected or unprotected did you feel your answers were?                                                                   | Very protected / Somewhat protected | Neither protected nor unprotected | Not very protected / not at all protected |
|                                                                                                                                                            | <b>56.5% (n = 143)</b>              | <b>30.4% (n = 77)</b>             | <b>13.0% (n = 33)</b>                     |
| How sensitive do you consider the questions about the quantity of your reptiles that have died in the first year of you owning them?                       | Very sensitive / somewhat sensitive | Neither sensitive nor insensitive | Not very sensitive / not at all sensitive |
|                                                                                                                                                            | <b>15.9% (n = 41)</b>               | <b>26.0% (n = 67)</b>             | <b>58.1% (n = 150)</b>                    |
| When asked directly, how likely do you think people would be to tell the truth when asked about the quantity of reptiles that have died in the first year? | Very likely / likely                | Neither likely nor unlikely       | Unlikely / very unlikely                  |
|                                                                                                                                                            | <b>41.2% (n = 105)</b>              | <b>25.5% (n = 65)</b>             | <b>33.3% (n = 85)</b>                     |
